# 1 **A longitudinal study of white matter** 2 **functional network in mild traumatic brain** 3 **injury**

4 Xiaoyan Jia<sup>1#</sup>, Xuebin Chang<sup>3#</sup>, Lijun Bai<sup>1, 2#</sup>, Yulin Wang<sup>4, 5</sup>, Debo Dong<sup>3, 6</sup>, Shuoqiu Gan<sup>1</sup>, Shan  
5 Wang<sup>1</sup>, Xuan Li<sup>1</sup>, Xuefei Yang<sup>1</sup>, Yinxiang Sun<sup>7</sup>, Tianhui Li<sup>1</sup>, Feng Xiong<sup>1</sup>, Xuan Niu<sup>7</sup>, Hao Yan<sup>8, 9\*</sup>

6

7 <sup>1</sup> The Key Laboratory of Biomedical Information Engineering, Ministry of Education, Department of  
8 Biomedical Engineering, School of Life Science and Technology, Xi'an Jiaotong University, Xi'an  
9 710049, China

10 <sup>2</sup> Department of Radiology, the Second Affiliated Hospital and Yuying Children's Hospital of  
11 Wenzhou Medical University, Wenzhou 325027, China

12 <sup>3</sup> The Clinical Hospital of Chengdu Brain Science Institute, MOE Key Lab for Neuroinformatics,  
13 Center for Information in Medicine, High-Field Magnetic Resonance Brain Imaging Key Laboratory of  
14 Sichuan Province, School of Life Science and Technology, University of Electronic Science and  
15 Technology of China, Chengdu 611731, China

16 <sup>4</sup> Department of Experimental and Applied Psychology, Faculty of Psychological and Educational  
17 Sciences, Vrije Universiteit Brussel, Brussels 1040, Belgium

18 <sup>5</sup> Department of Data Analysis, Faculty of Psychology and Educational Sciences, Ghent University,  
19 Henri Dunantlaan 1, Ghent B-9000, Belgium

20 <sup>6</sup> Institute of Neuroscience and Medicine, Brain & Behaviour (INM-7), Research Centre Jülich,  
21 Jülich, Germany

22 <sup>7</sup> Department of Medical Imaging, the First Affiliated Hospital of Xi'an Jiaotong University, Xi'an,  
23 China

24 <sup>8</sup> Key Laboratory for artificial intelligence and cognitive neuroscience of language, Xi'an International  
25 Studies University, Xi'an 710128, China

1 <sup>9</sup>Department of linguistics, School of foreign languages, Xidian University, Xi' an 710126, China

2

3 #These authors contributed equally to this study.

4 \*Correspondence: Hao Yan

5 E-mail: xiaoyan\_jia@stu.xjtu.edu.cn

6 Address: Key laboratory for artificial intelligence and cognitive neuroscience of language, Xi'an

7 International Studies University, Xi' an 710128, China

## 1 **Abstract**

2 The mild traumatic brain injury (mTBI) results in traumatic axonal injury, which damages the  
3 long-distance white matter (WM) connections and thus disrupts the functional connectome of  
4 large-scale brain networks that support cognitive function. Patterns of WM structural damage following  
5 mTBI were well documented using diffusion tensor imaging, however, the functional organization of  
6 WM and its association with grey matter functional networks (GM-FNs) and cognitive assessments  
7 remains unknown. The present study adopted resting-state functional magnetic resonance imaging to  
8 explore WM functional properties in mTBI patients (113 acute patients, 56 chronic patients, 47 healthy  
9 controls (HCs)). Eleven large-scale WM functional networks (WM-FNs) were constructed by the  
10 k-means clustering algorithm which carried out in voxel-wise WM functional connectivity (FC).  
11 Compared to HCs, acute mTBI patients showed enhanced FC between inferior fronto-occipital  
12 fasciculus (IFOF) WM-FN and primary sensorimotor WM-FNs, and cortical primary sensorimotor  
13 GM-FNs. And FC between IFOF WM-FN and anterior cerebellar GM-FN was positively correlated  
14 with information processing speed. Moreover, all of these WM-FNs abnormalities were returned to the  
15 normal level at the chronic stage. Our findings suggest the compensatory mechanism of cognitive  
16 deficits in the acute stage and its involvement in facilitating recovery from cognitive deficits in the  
17 chronic stage. The convergent damage of the IFOF network highlighted its key role in our  
18 understanding of the pathophysiology mechanism of mTBI patients and thus might be regarded as a  
19 biomarker in the acute stage and a potential indicator of treatment effect.

20 **Key words:** Mild traumatic brain injury, White matter functional networks, fMRI, Resting-state  
21 functional connectivity, Compensatory mechanism.

22

## 1 **Introduction**

2 Traumatic brain injury (TBI) is a public health challenge of vast proportions but insufficiently  
3 recognized. More than 50 million people have a TBI worldwide each year, and it is evaluated that  
4 about half of the world's population will have one or more TBIs in their lifetime [1,2].

5 The mild TBI (mTBI) accounts for 80%~90% of all TBI cases in both civilian and military populations  
6 [3]. In general, mTBI results in traumatic axonal injury [4,5]. Previous studies suggested that the  
7 traumatic axonal injury would induce cortical network disconnection and disrupt cortical-subcortical  
8 pathways in mTBI [6-8], which further impair information transfer across brain networks [9] and  
9 produce cognition deficits [10]. Importantly, the long white matter (WM) tracts connections are  
10 particularly vulnerable to the mechanical trauma of TBI [11] and thus disrupt the functional  
11 communication of large-scale networks that support cognition [12]. For instance, the inferior  
12 fronto-occipital fasciculus (IFOF) is a brain region mediates feed-forward propagation of visual input  
13 to anterior frontal regions and was found to have direct top-down modulation of early visual processing  
14 [13]. IFOF was documented with reduced WM integrity in mTBI patients [14]. Besides, the corpus  
15 callosum and internal capsule are regions where projection and contact fibers are highly concentrated.  
16 These two regions are responsible for the transmission of important information such as somatosensory  
17 and motor signals, and are the most commonly damaged regions in mTBI [15,16]. And previous study  
18 evidenced the cognition deficit might due to the damage of WM connecting the widely distributed grey  
19 matter (GM) networks [17], suggested the WM play a crucial role in information communication  
20 among large-scale brain networks. Although previous studies revealed the alterations in WM tracts in  
21 mTBI patients using diffusion tensor imaging (DTI), functional organization of WM and its association  
22 with GM functional networks (GM-FNs) across whole brain remains unknown.

23 Over the past two-decades, resting-state functional magnetic resonance imaging (rs-fMRI) has been a  
24 powerful technique for investigating the functional architecture of human GM [18,19]. Recently,  
25 increasing studies have evidenced the existence of functional information in WM, which can also be  
26 detected by rs-fMRI [20-22]. For instance, Ding et al. uncovered that resting-state BOLD signals in  
27 WM reflect neural coding and information processing [20]. Several studies further indicated that the

1 WM would be activated in response to multiple tasks, such as perceptual and motor tasks [23-25].  
2 Besides, the large-scale functional organization of WM has been built [26,27]. Furthermore, recent  
3 studies revealed that the functional connectivity (FC) in WM is related to the underlying  
4 pathophysiological mechanism of neuropsychiatric disorders, such as Parkinson's disease [28],  
5 schizophrenia [29], and epilepsy [30]. Together, all previous studies have suggested the involvement of  
6 functional network of WM in cognitive and disorder progression. Evidently, the WM lesions widely  
7 exist in mTBI and the impact of these lesions on cognition is well documented in previous studies.  
8 Therefore, the present study constructed the WM-FNs of mTBI patients, and further investigated the  
9 longitudinal neuroimaging trajectories of functional properties of WM functional networks (WM-FNs)  
10 and its association with GM-FNs in mTBI patients to deepen our understanding of the pathological  
11 mechanism of cognitive deficits in mTBI patients.

12 The present study aims to (i) construct large-scale WM-FNs by k-means clustering analysis on rs-fMRI  
13 data of a large cohort of 113 acute mTBI patients (of which 56 patients followed-up at six months to  
14 one year , which were considered as chronic stage patients) and 47 healthy controls (HCs). (ii)  
15 investigate the FC within the resulting large-scale WM-FNs and its interaction with the known  
16 GM-FNs in both acute and chronic mTBI patients. (iii) estimate the spatial interaction between the  
17 resulting WM-FNs and structural WM tracts. (iv) measure the correlations between WM functional  
18 disturbances and cognitive and clinical assessments of mTBI patients.

## 19 **Material and methods**

### 20 **Participants**

21 One hundred and thirteen consecutive patients suffering from head trauma were recruited from the  
22 local emergency department between August 2016 and May 2018 as the initial population. The  
23 inclusion and exclusion criteria of mTBI were based on the World Health Organization's Collaboration  
24 Centre for Neurotrauma Task Force [31]. The detailed inclusion and exclusion criteria of mTBI  
25 patients were described in the supplementary material. Fifty-six of mTBI patients in the acute stage

1 were followed up for six months to one year, with repeat MRI and cognitive and clinical assessment.  
2 Forty-seven age-, gender-, and education-matched HCs with no history of neurologic impairment or  
3 psychiatric disorders were included.  
4 MRI scans of patients with mTBI were initially assessed in acute stage (within 7 days post-injury) and  
5 followed up at chronic stage (6 months to 1-year post-injury). Cognitive and clinical assessment (see  
6 below) was carried out within 48 hours of MRI scans. All HCs participants also underwent an identical  
7 MRI scanning and cognitive and clinical assessment.  
8 All participants were right-handed according to the Edinburgh Handedness Inventory [32]. Written  
9 informed consent was obtained from each individual before the experimental procedures. The research  
10 procedures have been approved by the Local Institutional Review Board (the First Affiliated Hospital  
11 of Xi'an Jiaotong University) and conducted in line with the Declaration of Helsinki.

## 12 Image acquisition

13 A non-contrast CT scan was performed on all consecutive patients following acute head injury with a  
14 64-row CT scanner (GE, Lightspeed VCT). All participants underwent MRI scanning in a 3.0 T MRI  
15 scanner (GE 750) with a 32-channel head coil. The detailed scan parameters were described in the  
16 supplementary material.

## 17 Cognitive and clinical assessment

18 Cognitive assessment included: (a) Trail-Making Test Part A (TMT-A) and WAIS-III Digital Symbol  
19 Coding score (DSC), which were used to evaluate cognitive information processing speed [33]; (b)  
20 WAIS-III Forward Digit Span (DS) and Backward DS, which were used to measure working memory  
21 [34]; (c) Verbal Fluency (VF) Test, which was used to examine language ability, semantic memory,  
22 and executive function [35]. And clinical assessment included: (a) Post-concussive symptoms were  
23 evaluated based on Rivermead Post-Concussion Symptom Questionnaire (RPCS) [36]; (b) Insomnia  
24 Severity Index (ISI) [37]; (c) Posttraumatic stress disorder (PTSD) Checklist-Civilian Version (PCL-C)  
25 [38].

## 1 Data Preprocessing

2 Preprocessing steps of rs-fMRI and T1 data were carried out using the DPABI (<http://rfmri.org/dpabi>)  
3 [39] and SPM (<https://www.fil.ion.ucl.ac.uk/spm>). Fig. 1 demonstrated the preprocessing steps. In  
4 detail, the rs-fMRI data were 1) discarded the first five volumes, 2) slice-time corrected, 3) realigned, 4)  
5 regressed out linear trend signal, 24 head motion parameters, and the mean cerebrospinal fluid (CSF)  
6 signals, 5) performed temporal scrubbing using motion “spike” (framewise displacement (FD) > 0.5) as  
7 separate repressors, 6) filtered by using a band-pass filter (0.01 to 0.15 Hz) for reducing the  
8 non-neuronal contribution to BOLD signals which is in line with prior WM FC studies [27,29] , 7)  
9 spatial smoothed (full width at half maximum = 4 mm) of WM and GM signals separately within  
10 individual WM mask or GM mask to avoid the mixture of WM and GM signals, 8) normalized to  
11 standard EPI template and resampled voxel size into 3 mm × 3 mm × 3 mm. For T1 image, the T1 data  
12 were segmented into WM, GM, and CSF using SPM’s New Segment algorithm. The T1 segmentation  
13 results from individual subjects were co-registered to the functional data space for each individual for  
14 further the identification WM or GM mask (the segmentation threshold was set to 0.5 using SPM’s  
15 tissue segmentation).

16 Preprocessing of DTI data was performed using FSL (<https://fsl.fmrib.ox.ac.uk/fsl>) software [40], the  
17 preprocessing steps included skull stripping of the b0 image, eddy current correction, head motion  
18 correction, and registering and aligning to T1 image by mutual information algorithm. The DTI and  
19 anatomical T1 images were normalized into MNI space.

## 20 Clustering WM-FNs

21 The processed resting-state data of mTBI patients in the acute stage and HCs subjects were used to  
22 cluster WM-FNs.

23 First, the segmentation results about the T1 image of each individual were used to create the group  
24 WM and GM mask (Fig. 1). For each voxel of each subject, the identification of WM, GM, or CSF was  
25 depended on the maximum probability value of the T1 segmentation results. The WM, GM, and CSF

1 mask for each individual were generated subsequently. And the percentage of participants classified as  
2 WM or GM was obtained by averaging across all participants. For WM, voxel with a percentage  
3 greater than 60% of subjects was identified as a group-level WM mask. For GM, a loose threshold of a  
4 percentage greater than 20% of subjects was identified as a group-level GM mask but excluded the  
5 voxels included in the WM mask. Of note, to correctly classify deep brain structures [41], the  
6 subcortical areas (according to the Harvard-Oxford Atlas [42]) were excluded from the WM mask.  
7 Besides, the resulting masks were used to compare with the preprocessed functional data, then we  
8 excluded voxels that were identified as GM or WM but without functional data in >20% of the subjects.  
9 The group-level WM mask was further co-registered to the functional data space and resampled for  
10 rs-fMRI processing. The group-level WM mask contained 17863 voxels.

11 After generating the GM and WM mask, the K-means clustering algorithm on the averaged group-level  
12 resting-state correlation matrices was used to obtain WM-FNs (Fig. 1). To reduce computational  
13 complexity, the 17863 voxels of the WM mask were subsampled into 4466 nodes using an  
14 interchanging grid strategy [43]. Specifically, any second voxel was extracted along the rows and  
15 columns and then moved one between the two slices. The Pearson correlation matrix was calculated  
16 between all WM voxels and sub-sample nodes to obtain the correlation matrix ( $17863 \times 4466$ ) for each  
17 subject. K-means clustering method (distance metric-correlation, 10 replicates) from machine learning  
18 was carried out in the mean correlation matrices. Given clustering method was carried out for an  
19 unequal number between patients and the HCs group, the clustering results have the possibility to focus  
20 more on the patients, thus lead to the results more inclined to patients. Therefore, the correlation matrix  
21 was first averaged in HCs group and mTBI group separately, and then averaged again to obtain final  
22 correlation matrix which used for clustering.

23 Furthermore, to identify the most reliable number of WM-FNs, the stability of each number of clusters  
24 ranging from 2 to 22 was evaluated. The whole connectivity matrix ( $17863 \times 4466$ ) was randomly  
25 divided into four sub-folds ( $17863 \times 1125$ ). For each kinds of cluster number, each sub-fold carried out  
26 the same clustering computation separately so that four clustering results were obtained. To evaluate  
27 the similarity of clustering between different sub-folds, the adjacency matrix for each sub-fold was  
28 calculated. Then these adjacency matrices were compared using Dice's coefficient. The stability of the



1 number of clusters was evaluated according to the averaged coefficient of Dice. Furthermore, to ensure  
2 the stability of the above results, the above process was repeated for 10 times. Afterward, the average  
3 Dice's coefficient value of the 10 times was taken as the final Dice's coefficient.

4 The WM-FNs atlas at the acute stage was also used to analyze the pathological changes of WM-FNs in  
5 the chronic stage. To avoid the alteration of the results by the functional reconstruction of WM-FNs in  
6 the chronic stage, the WM-FNs clustering of the chronic stage were added (see Supplementary  
7 material).

## 8 Similarity between WM-FNs and DTI fiber tracts

9 The spatial similarity between the WM-FN and DTI fiber tracts was evaluated to investigate the spatial  
10 correspondence between them. To identify DTI tracts, the automated fiber quantification algorithm was  
11 used to automatically identify 20 fiber tracts depended on the JHU WM tractography atlas. When the  
12 voxels where a DTI fiber tract identified in  $> 2$  subjects and belonged to the group-level WM mask  
13 constructed previously, the voxels were incorporated into the DTI fiber tract. It should be noted that  
14 symmetrical DTI fiber tracts in two hemispheres of the brain were combined as one tract. Furthermore,  
15 to investigate the similarity between WM-FNs and DTI fiber tracts, the number of overlapping voxels  
16 of each WM-FN and each DTI fiber tract were calculated. The percentage of voxels in the WM-FN  
17 which can be identified as part of the DTI tracts ( $\text{overlap}/\text{WM-FN}$ ) was also calculated.

## 18 Functional connectivity

19 To evaluate the interaction within the resulting WM-FNs, the average signal time-courses from  
20 WM-FNs were extracted by averaging the signal values across all voxels which were belonged to each  
21 network for each individual. The Pearson's correlation between any two WM-FNs' time-courses for  
22 each individual was computed. Besides, to evaluate the interaction between the WM-FNs and GM-FNs,  
23 the GM-FNs atlas which was generated by the same clustering procedure [44] was used, and Pearson's  
24 correlation between the WM-FNs and GM-FNs was also computed. These correlation coefficients were  
25 averaged across subjects to obtain a group level matrix representing the relationship between WM and

1 GM-FN. Of note, the Pearson's correlation coefficients were transformed into the Fisher z score before  
2 statistical analysis.

### 3 **Statistical analysis**

4 The normality distribution of all cognitive and clinical continuous variables was tested by the  
5 Shapiro-Wilk W test. The group differences about cognitive and clinical continuous variables were  
6 calculated by the independent two-sample t-test and Mann-Whitney test based on data normality,  
7 respectively. Chi-square was used to compare cognitive and clinical categorical variables, with a  
8 significant set at  $p < 0.05$ .

9 And independent two-sample t-test was used to show the differences between the mTBI and HCs about  
10 the z-score of FC (Pearson's correlation coefficient), with a significance set at  $p < 0.05$  (false discovery  
11 rate corrected, FDR corrected). Since the age of chronic stage patients and HCs was not very well  
12 matched ( $p = 0.064$ ), age was regressed in the statistical analysis of the chronic stage to avoid the  
13 influence of brain development.

### 14 **Correlation between altered WM-FNs and cognitive and clinical** 15 **assessments**

16 To evaluate the relationship between altered imaging results and cognitive and clinical assessments, we  
17 calculated the Spearman correlation between altered FC and cognitive and clinical variables since the  
18 cognitive and clinical variables were not normally distributed.

## 19 **Results**

### 20 **Demographic, cognitive and clinical characteristics**

21 Sixteen patients with mTBI in the acute stage and four HCs with head motion scans exceeding 2 mm  
22 and/or 2° rotation were excluded. The final analysis included 97 mTBI patients in the acute stage, 56

1 mTBI patients in the chronic stage, and 43 HCs. The mTBI patients did not differ from HCs regarding  
2 age, education, gender, and mean FD (Table 1).

3 Significant differences were revealed between patients with mTBI in acute stage and HCs in TMT-A ( $p$   
4 = 0.023), DSC ( $p$  = 0.021), RPCS ( $p$  < 0.001), ISI ( $p$  < 0.001), and PCL-C ( $p$  < 0.001) (Table 1,  $p_1$   
5 represent the  $p$ -value from statistical test between acute mTBI patients and HCs). And significant  
6 differences in Forward DS ( $p$  = 0.037), Backward DS ( $p$  = 0.008), RPCS ( $p$  = 0.014), ISI ( $p$  = 0.009),  
7 and PCL-C ( $p$  < 0.001) were observed between patients with mTBI in chronic stage and HCs (Table 1,  
8  $p_2$  represent the  $p$ -value from statistical test between chronic mTBI patients and HCs). The detailed  
9 demographic information and cognitive and clinical assessments of mTBI and HCs were demonstrated  
10 in Table 1.

## 11 WM-FNs

12 The coefficient of Dice was adopted to evaluate the stability of WM-FNs number, the results  
13 demonstrated the most stable (Dice's coefficient > 0.85) with the largest number of WM-FNs was 11  
14 (Fig. 2). The WM-FN is given a putative network name based on the anatomical location. The  
15 WM-FNs can be named as: WM1 (IFOF network), WM2 (corona radiate network), WM3 (anterior  
16 temporal network), WM4 (orbito-frontal network), WM5 (pre/postcentral network), WM6 (superior  
17 longitudinal fasciculus network), WM7 (ventral frontal network), WM8 (temporoparietal network),  
18 WM9 (Rolandic network), WM10 (cerebellar network), WM11 (occipital network) (Fig. 2, Table 2).  
19 Besides, based on the spatial distribution [24], we defined middle/superficial WM-FNs (WM-FN 2, 3, 4 ,  
20 5, 7, 8 , 9, 10, 11) and deep WM-FNs (WM-FN 1, 6) (Fig. 2, Table 2)

## 21 Similarity between WM-FNs and DTI fiber tracts

22 Four WM-FN (2, 5, 9, 10) of the 11 networks observed spatial correspondence with specific DTI  
23 anatomical tracts (e.g., network 9 and superior longitudinal fasciculus;) (Fig. 3, Table 2). And the other  
24 networks spatial corresponded to multiple DTI tracts (e.g., network 1 spatial corresponded to both  
25 IFOF and inferior longitudinal fasciculus;) (Fig. 3, Table 2).

## 1 Functional connectivity

### 2 Functional connectivity and its association with cognitive deficits in the 3 acute stage

4 Across subjects, middle/superficial WM-FNs demonstrated high correlation in their spontaneous  
5 activity with their adjacent GM-FNs and some distributed GM-FNs, such as occipital network and  
6 visual network ( $r = 0.92$ ), rolandic network and sensorimotor network ( $r = 0.92$ ), temporoparietal  
7 network and default mode network ( $r = 0.87$ ) (Fig. 4 (a), Table 2). Besides, a relatively weak  
8 correlation ( $r < 0.55$ ) was revealed between the deep WM-FNs and GM-FNs (Fig. 4 (a)).

9 Across subjects, between adjacent WM-FNs, such as the superior longitudinal fasciculus network and  
10 IFOF network, showed a strong correlation ( $r = 0.74$ ) (Fig. 4 (b), Table 2). Between distant WM-FNs,  
11 such as cerebellar WM-FN and the other WM-FNs, showed relatively weak correlation ( $r < 0.60$ ) (Fig.  
12 4 (b)).

13 Compared to HCs, patients with mTBI showed increased FC between the deep WM-FN and low-level  
14 primary sensorimotor cortical GM-FNs. In detail, mTBI patients showed increased FC between IFOF  
15 WM-FN and visual GM-FN, IFOF WM-FN and anterior cerebellar GM-FN, IFOF WM-FN and  
16 sensorimotor GM-FN (Fig. 4 (c), Table 3).

17 Compared to HCs, patients with mTBI also showed increased FC between deep WM-FN and low-level  
18 primary sensorimotor superficial WM-FN. In detail, patients with mTBI showed increased FC between  
19 IFOF WM-FN and occipital WM-FN. Also, patients with mTBI showed increased FC between IFOF  
20 WM-FN and pre/postcentral WM-FN (Fig. 4 (c), Table 3).

21 Taken together, the IFOF WM-FN is the most affected WM-FN, which showed increased connectivity  
22 with low-level primary sensorimotor functional networks in acute mTBI patients.

23 The FC between IFOF WM-FN and anterior cerebellar GM-FN was positively correlated with TMT-A  
24 score (Fig. 4 (d)).

## 1 Functional connectivity and its association with cognitive deficits in the 2 chronic stage

3 Similar to the acute stage, the interaction between WM-FNs and GM-FNs in the chronic stage showed  
4 a relatively high correlation between middle/superficial WM-FNs and adjacent GM-FNs, such as the  
5 occipital network and visual network ( $r = 0.92$ ), rolandic network and sensorimotor network ( $r = 0.92$ ),  
6 temporoparietal network and default mode network ( $r = 0.87$ ). The deep WM-FN and GM-FNs showed  
7 a relatively weak correlation ( $r < 0.55$ ) (Fig. 5 (a)).

8 The interaction between pair of WM-FNs in the chronic stage was also similar to the acute stage with a  
9 strong correlation between adjacent WM-FNs, such as the superior longitudinal fasciculus network and  
10 IFOF network ( $r = 0.75$ ) (Fig. 5 (b)). A relatively weak correlation was presented between distant  
11 WM-FNs, such as cerebellar WM-FN and the other WM-FNs ( $r < 0.60$ ) (Fig. 5 (b)).

12 The mTBI patients did not differ from HCs regarding FC between WM and GM-FNs (Fig. 5 (c)). Also,  
13 mTBI patients and HCs did not differ regarding FC within WM-FNs (Fig. 5 (d)).

14 Besides, even the WM-FNs were constructed by the patients in chronic stage and HCs, the results  
15 remain stable (see in supplementary material).

## 16 **Discussion**

17 The present study, for the first time, investigated the dynamic change of WM-FN in mTBI within a  
18 longitudinal study. Eleven distinct WM-FNs were identified by clustering voxel-wise WM functional  
19 connectivity. These networks are corresponded to either a specific or multiple anatomical DTI WM  
20 tracts. The altered FC of WM-FN was observed in the acute stage but not in the chronic stage,  
21 suggesting a possible compensatory mechanism in the chronic recovery stage. Importantly, the IFOF  
22 WM-FN demonstrated enhanced FC both with the low-level GM primary sensorimotor networks, and  
23 with the low-level WM primary sensorimotor networks in acute mTBI patients. These enhanced FC  
24 may represent a compensatory or protective mechanism in response to cognitive deficits in acute mTBI.  
25 The convergent damage of IFOF network highlighted the importance of IFOF WM-FN in our

1 understanding of the pathophysiology mechanism of mTBI patients, which can further aid the  
2 promotion of new treatment intervention that targeting IFOF network in the acute stage.

### 3 The spatial similarity between WM-FNs and DTI fiber tracts

4 In previous studies, the WM tracts integrity analysis of mTBI patients were observed mainly based on  
5 structural MRI, such as DTI. The current study reported a novel observation of functional  
6 communication of WM in mTBI patients. The constructed WM-FNs were corresponded to either a  
7 specific or multiple anatomically DTI WM tracts. This is consistent with the previous study [27] to  
8 support the notion that multiple DTI tracts collaborate with each other to guarantee the specific brain  
9 function. The analysis of spatial interacting patterns between DTI fiber tracts and WM-FNs helps to  
10 clarify which DTI fiber tract can be reflected by the WM-FN, especially by the deep WM networks.  
11 For example, the identified IFOF functional network was mainly a spatial interaction with IFOF fiber  
12 tract (Fig. 3, Table 2). Thus, the IFOF functional network was assumed to mainly reflect the function of  
13 IFOF fiber tract. It should be noted that it is difficult to describe middle/superficial WM-FNs using DTI  
14 fiber tract since they combine many small fibers with different orientations [45]. Therefore, the  
15 function of middle/superficial WM-FNs is mainly reflected by their connectivity with cortical GM-FNs.  
16 For instance, the occipital WM-FN showed strong connectivity with cortical visual GM-FN, so that the  
17 occipital WM-FN was assumed to also reflect the visual function to some extent. In sum, and together  
18 with previous study [46,21,27], these results provide further support that WM-FNs have corresponding  
19 structural base.

### 20 Functional connectivity in the acute stage

21 Intriguingly, the IFOF WM-FN was found to be the most affected deep WM-FN in mTBI patients. The  
22 IFOF WM-FN showed enhanced FC both with the low-level GM primary sensorimotor networks  
23 (visual network, anterior cerebellar network, and sensorimotor network), and with the low-level WM  
24 primary sensorimotor networks (occipital network and pre/postcentral network) in patients with mTBI  
25 at the acute stage. Previous studies have reported the damaged structure property in IFOF in patients  
26 with mTBI [47,48]. Here, for the first time, the present study showed that increased IFOF FC with

1 low-level WM and GM primary sensorimotor networks in patients with mTBI. In general, the  
2 increased positive FC reflects an increased integrative ability sub-serving similar goals [49]. Hence, the  
3 increased IFOF FC may reflect a compensatory mechanism in mTBI. As a long-distance associative  
4 tract, the IFOF plays a crucial role in connecting the occipital lobe, the parietal lobe, and the  
5 poster-temporal cortex with the frontal lobe [13], which was particularly vulnerable to the mechanical  
6 trauma of TBI [11]. Correspondingly, the IFOF is crucial in sending the processed visual information  
7 from the occipital lobe to frontal lobe, where information was further translated into semantic  
8 information [50]. The observed increased connectivity between IFOF FC with low-level WM and GM  
9 primary sensorimotor networks may represent a compensatory effect in response to cognitive deficits.  
10 These enhanced FCs may indicate mTBI patients employed higher cognitive effort in integrating  
11 dynamic environmental sensory information and high-order cognitive function to coordinate their  
12 behaviors and thoughts to fit with contextual information. This interpretation is supported by previous  
13 studies which demonstrated abnormal activation of the intrinsic rich-club network in mTBI patients [51]  
14 and greater network strength in mTBI patients without post-concussive syndrome [52]. Both studies  
15 suggested a potential compensatory or protective mechanism in mTBI patients. The current findings  
16 highlighted the importance of the IFOF WM-FN in such a compensatory mechanism, in which IFOF  
17 WM-FN may excessively contribute to integrating sensory information from GM and WM primary  
18 sensory-related network with high-order cognitive information in acute mTBI patients. The most  
19 affected damage in mTBI was located in IFOF network, which implies the crucial role of IFOF  
20 network in our understanding of the pathophysiology mechanism of mTBI patients. This observation  
21 can further aid the promotion of new treatment intervention targeting IFOF network in the acute stage.

## 22 The association between altered WM-FNs and cognitive 23 assessments

24 Besides, the FC between IFOF WM-FN and anterior cerebellar GM-FN was positively correlated with  
25 TMT-A score in mTBI patients at acute stage. This correlation suggested a deficit of the information  
26 processing speed in acute mTBI patients. Information processing speed is depend on large-scale and  
27 long-distance neural network communications, which is among the earliest and most prominent

1 cognitive manifestations in mTBI [53,54]. Thus, the deficit of information processing speed was  
2 assumed to be caused by the damage of IFOF network in acute mTBI patients to some extent.

### 3 Functional connectivity in the chronic stage

4 Furthermore, mTBI patients at the chronic stage did not differ from HCs in FC within WM-FNs or  
5 between GM-FN and WM-FN. A previous meta-analysis indicated that the damage effects for memory  
6 and fluency were greatest in the acute stage (less than 3 months postinjury) and no residual impairment  
7 by 3 months postinjury [55]. Besides, a recent large sample longitudinal neuroimaging study of TBI  
8 revealed a ‘U-shaped’ curve in sub-acute, 1 year, and 5 years postinjury in the number of fractional  
9 anisotropy abnormalities [56]. Furthermore, a previous study demonstrated a functional and structural  
10 abnormal connectivity in early phase of mTBI, but a considerable compensation of functional and  
11 structural connectivity subsequent to the acute phase [57]. Combining previous studies and the current  
12 findings, it is evident that the compensatory mechanism of brain function contributed to the recovery of  
13 cognition deficits in mTBI patients at the chronic stage.

### 14 Limitation

15 Notwithstanding its implication, limitations of the current study should be acknowledged and addressed.  
16 Some researchers have speculated that the WM signals might have infiltrated from the GM for partial  
17 volume effect. To avoid the influence of GM signals, the spatial smooth of WM and GM signals were  
18 separately carried out within individual WM mask or GM mask to avoid the mixture of WM and GM  
19 signals. Besides, only the data of mTBI patients in the acute stage and the chronic stage (6-12 months  
20 postinjury) was collected, the data for longer follow-up, such as 5 years postinjury should be collected  
21 as a follow-up. Based on a previous study [56], the significant abnormalities of FA in TBI were  
22 observed at the sub-acute and 5 years postinjury, but not 1-year postinjury. Therefore, it is necessary to  
23 follow patients for a longer period to explore the development of the observed deficits of WM-FNs.



## 1 **Conclusion**

2 In summary, this study constructed WM-FNs based k-means clustering algorithm and revealed an  
3 excessive interaction between deep WM-FNs and low-level primary sensorimotor networks, which can  
4 be regarded as a compensatory mechanism of cognitive deficits in mTBI patients in the acute stage. Of  
5 note, patients with mTBI did not differ from HCs at the chronic stage in FC within WM-FNs or  
6 between GM and WM-FN, suggesting a possible compensatory mechanism of brain function  
7 contributed to the recovery of cognition deficits in mTBI patients at the chronic stage. The convergent  
8 damage of IFOF network highlighted its key role in our understanding of the pathophysiology  
9 mechanism of mTBI patients and thus might be regarded as a biomarker in the acute stage and a  
10 potential indicator of treatment effect.

## 11 **Funding**

12 This study was supported by the National Science Foundation of China [grant number 81771914], the  
13 Humanities and Social Science Foundation of Ministry of Education of China [grant number  
14 19YJC740100], and the Fundamental Research Funds for the Central Universities [grant number  
15 RW180178].

## 16 **Conflicts of interest**

17 The authors declare that they have no conflict of interest.

18

## 1 **Supplementary material**

### 2 **Detailed inclusion and exclusion criteria of mTBI patients**

3 In detail, patients with mTBI were selected with the following criteria: (a) Glasgow Coma Score of  
4 13-15; (b) one or more of the following: confusion or disorientation, post-traumatic amnesia for less  
5 than 24 hours, loss of consciousness for 30 minutes or less, and/or other transient neurological  
6 abnormalities such as focal signs, seizure, and intracranial lesion not requiring surgery; (c) diagnosed  
7 within 1 week after onset of mTBI. The exclusion criteria included: (a) a history of a previous brain  
8 injury, neurological disease, long-term psychiatric history, or a history of concurrent substance or  
9 alcohol abuse; (b) a structural abnormality in neuroimaging (CT and MRI); (c) intubation and/or skull  
10 fracture, and administration of sedatives; (d) the manifestation of mTBI caused by medications, alcohol,  
11 drugs for other injuries (such as systemic injuries, facial injuries, or intubation); (e) other problems  
12 (such as psychological trauma, language impairment, or coexisting medical conditions); (f) caused by  
13 penetrating craniocerebral injury.

### 14 **Image acquisition**

15 The rs-fMRI data was acquired using a gradient-recalled echo planar imaging (EPI) sequence, and the  
16 scan parameters were as follows: repetition time (TR) = 2500 ms, echo time (TE) = 30 ms, slice  
17 thickness = 3 mm, flip angle (FA) = 90°, field of view (FOV) = 216 mm × 216 mm, matrix size = 64 ×  
18 64. One hundred and eighty volumes were obtained. The scan parameters of High-resolution  
19 T1-weighted 3D BRAVO sequence were as follows: TR = 8.15 ms, TE = 3.17 ms, slice thickness = 1  
20 mm, FA = 9°, FOV = 256 mm × 256 mm. The scan parameters of DTI were as follows: TR = 8000 ms,  
21 TE = 68ms, FA = 90°, slice thickness = 2mm, slices = 75, matrix size = 128 × 128, two averages, FOV  
22 = 256 mm × 256 mm, voxel size = 2 mm × 2 mm × 2 mm. DTI (b = 1000 s/mm<sup>2</sup>) used 30 diffusion  
23 gradient orientations and the unweighted diffusion imaging (b = 0) repeated five times. During  
24 scanning, all participants were instructed to relax, close their eyes, keep awake, and try not to think of  
25 anything in particular.

### 26 **WM-FNs clustering of the chronic stage**

27 The WM-FNs clustering based on the data of patients in the chronic stage and HCs data were also  
28 calculated to avoid the functional reconstruction of WM-FNs in the chronic stage. According to the  
29 results of Dice's coefficient (Supp Fig. 1), we identified 12 WM-FNs (Supp Fig. 1). Compared with  
30 HCs, there also was no significant difference between patients and healthy control in functional

- 1 connectivity between WM-FNs and GM functional connectivity, and no significant difference between
- 2 patients and healthy control in functional connectivity within WM-FNs in the chronic stage of mTBI
- 3 (Supp Fig. 2).
  
- 4

## 1 **References**

- 2 1. Feigin VL, Theadom A, Barker-Collo S, Starkey NJ, McPherson K, Kahan M, Dowell A, Brown P,  
3 Parag V, Kydd R, Jones K, Jones A, Ameratunga S, Group BS (2013) Incidence of traumatic brain  
4 injury in New Zealand: a population-based study. *Lancet Neurol* 12 (1):53-64.  
5 doi:10.1016/S1474-4422(12)70262-4
- 6 2. Maas AIR, Menon DK, Adelson PD, Andelic N, Bell MJ, Belli A, Bragge P, Brazinova A, Buki A,  
7 Chesnut RM, Citerio G, Coburn M, Cooper DJ, Crowder AT, Czeiter E, Czosnyka M, Diaz-Arrastia R,  
8 Dreier JP, Duhaime AC, Ercole A, van Essen TA, Feigin VL, Gao G, Giacino J, Gonzalez-Lara LE,  
9 Gruen RL, Gupta D, Hartings JA, Hill S, Jiang JY, Ketharanathan N, Kompanje EJO, Lanyon L,  
10 Laureys S, Lecky F, Levin H, Lingsma HF, Maegele M, Majdan M, Manley G, Marsteller J, Mascia L,  
11 McFadyen C, Mondello S, Newcombe V, Palotie A, Parizel PM, Peul W, Piercy J, Polinder S,  
12 Puybasset L, Rasmussen TE, Rossaint R, Smielewski P, Soderberg J, Stanworth SJ, Stein MB, von  
13 Steinbuchel N, Stewart W, Steyerberg EW, Stocchetti N, Synnot A, Te Ao B, Tenovuo O, Theadom A,  
14 Tibboel D, Videtta W, Wang KKW, Williams WH, Wilson L, Yaffe K, In TP, Investigators (2017)  
15 Traumatic brain injury: integrated approaches to improve prevention, clinical care, and research.  
16 *Lancet Neurol* 16 (12):987-1048. doi:10.1016/S1474-4422(17)30371-X
- 17 3. Robertson CS, Garcia R, Gaddam SS, Grill RJ, Cerami Hand C, Tian TS, Hannay HJ (2013)  
18 Treatment of mild traumatic brain injury with an erythropoietin-mimetic peptide. *J Neurotrauma* 30  
19 (9):765-774. doi:10.1089/neu.2012.2431
- 20 4. Bazarian JJ, Zhong J, Blyth B, Zhu T, Kavcic V, Peterson D (2007) Diffusion tensor imaging detects  
21 clinically important axonal damage after mild traumatic brain injury: a pilot study. *J Neurotrauma* 24  
22 (9):1447-1459. doi:10.1089/neu.2007.0241
- 23 5. Kirov, II, Tal A, Babb JS, Reaume J, Bushnik T, Ashman TA, Flanagan S, Grossman RI, Gonen O  
24 (2013) Proton MR spectroscopy correlates diffuse axonal abnormalities with post-concussive  
25 symptoms in mild traumatic brain injury. *J Neurotrauma* 30 (13):1200-1204.  
26 doi:10.1089/neu.2012.2696
- 27 6. Gennarelli TA, Thibault LE, Adams JH, Graham DI, Thompson CJ, Marcincin RP (1982) Diffuse  
28 axonal injury and traumatic coma in the primate. *Ann Neurol* 12 (6):564-574.  
29 doi:10.1002/ana.410120611
- 30 7. Johnson VE, Stewart W, Smith DH (2013) Axonal pathology in traumatic brain injury. *Exp Neurol*  
31 246:35-43. doi:10.1016/j.expneurol.2012.01.013
- 32 8. Smith DH, Hicks R, Povlishock JT (2013) Therapy development for diffuse axonal injury. *J*  
33 *Neurotrauma* 30 (5):307-323. doi:10.1089/neu.2012.2825
- 34 9. Sharp DJ, Scott G, Leech R (2014) Network dysfunction after traumatic brain injury. *Nat Rev*  
35 *Neurol* 10 (3):156-166. doi:10.1038/nrneurol.2014.15
- 36 10. Bonnelle V, Ham TE, Leech R, Kinnunen KM, Mehta MA, Greenwood RJ, Sharp DJ (2012)  
37 Salience network integrity predicts default mode network function after traumatic brain injury. *Proc*  
38 *Natl Acad Sci U S A* 109 (12):4690-4695. doi:10.1073/pnas.1113455109
- 39 11. Adams JH, Graham DI, Gennarelli TA, Maxwell WL (1991) Diffuse axonal injury in non-missile  
40 head injury. *J Neurol Neurosurg Psychiatry* 54 (6):481-483. doi:10.1136/jnnp.54.6.481

- 1 12. Kinnunen KM, Greenwood R, Powell JH, Leech R, Hawkins PC, Bonnafe V, Patel MC, Counsell  
2 SJ, Sharp DJ (2011) White matter damage and cognitive impairment after traumatic brain injury. *Brain*  
3 134 (Pt 2):449-463. doi:10.1093/brain/awq347
- 4 13. Forkel SJ, Thiebaut de Schotten M, Kawadler JM, Dell'Acqua F, Danek A, Catani M (2014) The  
5 anatomy of fronto-occipital connections from early blunt dissections to contemporary tractography.  
6 *Cortex* 56:73-84. doi:10.1016/j.cortex.2012.09.005
- 7 14. Yin B, Li DD, Huang H, Gu CH, Bai GH, Hu LX, Zhuang JF, Zhang M (2019) Longitudinal  
8 Changes in Diffusion Tensor Imaging Following Mild Traumatic Brain Injury and Correlation With  
9 Outcome. *Front Neural Circuits* 13:28. doi:10.3389/fncir.2019.00028
- 10 15. Clark AL, Delano-Wood L, Sorg SF, Werhane ML, Hanson KL, Schiehser DM (2017) Cognitive  
11 fatigue is associated with reduced anterior internal capsule integrity in veterans with history of mild to  
12 moderate traumatic brain injury. *Brain Imaging Behav* 11 (5):1548-1554.  
13 doi:10.1007/s11682-016-9594-6
- 14 16. San Martin Molina I, Salo RA, Abdollahzadeh A, Tohka J, Grohn O, Sierra A (2020) In Vivo  
15 Diffusion Tensor Imaging in Acute and Subacute Phases of Mild Traumatic Brain Injury in Rats.  
16 *eNeuro* 7 (3). doi:10.1523/ENEURO.0476-19.2020
- 17 17. Mesulam MM (1998) From sensation to cognition. *Brain* 121 ( Pt 6):1013-1052.  
18 doi:10.1093/brain/121.6.1013
- 19 18. Dong D, Luo C, Guell X, Wang Y, He H, Duan M, Eickhoff SB, Yao D (2020) Compression of  
20 Cerebellar Functional Gradients in Schizophrenia. *Schizophr Bull*. doi:10.1093/schbul/sbaa016
- 21 19. Jia X, Xie Y, Dong D, Pei H, Jiang S, Ma S, Huang Y, Zhang X, Wang Y, Zhu Q, Zhang Y, Yao D,  
22 Yu L, Luo C (2020) Reconfiguration of dynamic large-scale brain network functional connectivity in  
23 generalized tonic-clonic seizures. *Hum Brain Mapp* 41 (1):67-79. doi:10.1002/hbm.24787
- 24 20. Ding Z, Huang Y, Bailey SK, Gao Y, Cutting LE, Rogers BP, Newton AT, Gore JC (2018)  
25 Detection of synchronous brain activity in white matter tracts at rest and under functional loading. *Proc*  
26 *Natl Acad Sci U S A* 115 (3):595-600. doi:10.1073/pnas.1711567115
- 27 21. Ding Z, Xu R, Bailey SK, Wu TL, Morgan VL, Cutting LE, Anderson AW, Gore JC (2016)  
28 Visualizing functional pathways in the human brain using correlation tensors and magnetic resonance  
29 imaging. *Magn Reson Imaging* 34 (1):8-17. doi:10.1016/j.mri.2015.10.003
- 30 22. Wu TL, Wang F, Anderson AW, Chen LM, Ding Z, Gore JC (2016) Effects of anesthesia on  
31 resting state BOLD signals in white matter of non-human primates. *Magn Reson Imaging* 34  
32 (9):1235-1241. doi:10.1016/j.mri.2016.07.001
- 33 23. Fabri M, Polonara G, Mascioli G, Salvolini U, Manzoni T (2011) Topographical organization of  
34 human corpus callosum: an fMRI mapping study. *Brain Res* 1370:99-111.  
35 doi:10.1016/j.brainres.2010.11.039
- 36 24. Gawryluk JR, Mazerolle EL, Brewer KD, Beyea SD, D'Arcy RC (2011) Investigation of fMRI  
37 activation in the internal capsule. *BMC Neurosci* 12:56. doi:10.1186/1471-2202-12-56
- 38 25. Wu X, Yang Z, Bailey SK, Zhou J, Cutting LE, Gore JC, Ding Z (2017) Functional connectivity  
39 and activity of white matter in somatosensory pathways under tactile stimulations. *Neuroimage*  
40 152:371-380. doi:10.1016/j.neuroimage.2017.02.074

- 1 26. Marussich L, Lu KH, Wen H, Liu Z (2017) Mapping white-matter functional organization at rest  
2 and during naturalistic visual perception. *Neuroimage* 146:1128-1141.  
3 doi:10.1016/j.neuroimage.2016.10.005
- 4 27. Peer M, Nitzan M, Bick AS, Levin N, Arzy S (2017) Evidence for Functional Networks within the  
5 Human Brain's White Matter. *J Neurosci* 37 (27):6394-6407. doi:10.1523/JNEUROSCI.3872-16.2017
- 6 28. Ji GJ, Ren C, Li Y, Sun J, Liu T, Gao Y, Xue D, Shen L, Cheng W, Zhu C, Tian Y, Hu P, Chen X,  
7 Wang K (2019) Regional and network properties of white matter function in Parkinson's disease. *Hum*  
8 *Brain Mapp* 40 (4):1253-1263. doi:10.1002/hbm.24444
- 9 29. Jiang Y, Luo C, Li X, Li Y, Yang H, Li J, Chang X, Li H, Yang H, Wang J, Duan M, Yao D (2019)  
10 White-matter functional networks changes in patients with schizophrenia. *Neuroimage* 190:172-181.  
11 doi:10.1016/j.neuroimage.2018.04.018
- 12 30. Jiang Y, Song L, Li X, Zhang Y, Chen Y, Jiang S, Hou C, Yao D, Wang X, Luo C (2019)  
13 Dysfunctional white-matter networks in medicated and unmedicated benign epilepsy with  
14 centrotemporal spikes. *Hum Brain Mapp* 40 (10):3113-3124. doi:10.1002/hbm.24584
- 15 31. Holm L, Cassidy JD, Carroll LJ, Borg J (2005) Summary of the WHO collaborating centre for  
16 neurotrauma task force on mild traumatic brain injury. *J Rehabil Med* 37 (3):137-141.  
17 doi:10.1080/16501970510027321
- 18 32. Oldfield RC (1971) The assessment and analysis of handedness: the Edinburgh inventory.  
19 *Neuropsychologia* 9 (1):97-113. doi:10.1016/0028-3932(71)90067-4
- 20 33. Arnett JA, Labovitz SS (1995) Effect of Physical Layout in Performance of the Trail Making Test.  
21 *Psychol Assessment* 7 (2):220-221
- 22 34. Harman-Smith YE, Mathias JL, Bowden SC, Rosenfeld JV, Bigler ED (2013) Wechsler Adult  
23 Intelligence Scale-Third Edition profiles and their relationship to self-reported outcome following  
24 traumatic brain injury. *J Clin Exp Neuropsych* 35 (8):785-798. doi:10.1080/13803395.2013.824554
- 25 35. Joy S, Kaplan E, Fein D (2004) Speed and memory in the WAIS-III Digit Symbol--Coding subtest  
26 across the adult lifespan. *Arch Clin Neuropsychol* 19 (6):759-767. doi:10.1016/j.acn.2003.09.009
- 27 36. King NS, Crawford S, Wenden FJ, Moss NE, Wade DT (1995) The Rivermead Post Concussion  
28 Symptoms Questionnaire: a measure of symptoms commonly experienced after head injury and its  
29 reliability. *J Neurol* 242 (9):587-592. doi:10.1007/bf00868811
- 30 37. Sadeghniaat-Haghighi K, Montazeri A, Khajeh-Mehrzi A, Nedjat S, Aminian O (2014) The  
31 Insomnia Severity Index: cross-cultural adaptation and psychometric evaluation of a Persian version.  
32 *Qual Life Res* 23 (2):533-537. doi:10.1007/s11136-013-0489-3
- 33 38. Weathers FW, Litz BT, Herman D, Huska J, Keane T (1994) The PTSD checklist-civilian version  
34 (PCL-C). Boston, MA: National Center for PTSD 10
- 35 39. Yan CG, Wang XD, Zuo XN, Zang YF (2016) DPABI: Data Processing & Analysis for  
36 (Resting-State) Brain Imaging. *Neuroinformatics* 14 (3):339-351. doi:10.1007/s12021-016-9299-4
- 37 40. Jenkinson M, Beckmann CF, Behrens TE, Woolrich MW, Smith SM (2012) Fsl. *Neuroimage* 62  
38 (2):782-790. doi:10.1016/j.neuroimage.2011.09.015
- 39 41. Lorio S, Fresard S, Adaszewski S, Kherif F, Chowdhury R, Frackowiak RS, Ashburner J, Helms G,  
40 Weiskopf N, Lutti A, Draganski B (2016) New tissue priors for improved automated classification of  
41 subcortical brain structures on MRI. *Neuroimage* 130:157-166. doi:10.1016/j.neuroimage.2016.01.062

- 1 42. Desikan RS, Segonne F, Fischl B, Quinn BT, Dickerson BC, Blacker D, Buckner RL, Dale AM,  
2 Maguire RP, Hyman BT, Albert MS, Killiany RJ (2006) An automated labeling system for subdividing  
3 the human cerebral cortex on MRI scans into gyral based regions of interest. *Neuroimage* 31  
4 (3):968-980. doi:10.1016/j.neuroimage.2006.01.021
- 5 43. Craddock RC, James GA, Holtzheimer PE, 3rd, Hu XP, Mayberg HS (2012) A whole brain fMRI  
6 atlas generated via spatially constrained spectral clustering. *Hum Brain Mapp* 33 (8):1914-1928.  
7 doi:10.1002/hbm.21333
- 8 44. Power JD, Cohen AL, Nelson SM, Wig GS, Barnes KA, Church JA, Vogel AC, Laumann TO,  
9 Miezin FM, Schlaggar BL, Petersen SE (2011) Functional network organization of the human brain.  
10 *Neuron* 72 (4):665-678. doi:10.1016/j.neuron.2011.09.006
- 11 45. Oishi K, Zilles K, Amunts K, Faria A, Jiang H, Li X, Akhter K, Hua K, Woods R, Toga AW, Pike  
12 GB, Rosa-Neto P, Evans A, Zhang J, Huang H, Miller MI, van Zijl PC, Mazziotta J, Mori S (2008)  
13 Human brain white matter atlas: identification and assignment of common anatomical structures in  
14 superficial white matter. *Neuroimage* 43 (3):447-457. doi:10.1016/j.neuroimage.2008.07.009
- 15 46. Ding Z, Newton AT, Xu R, Anderson AW, Morgan VL, Gore JC (2013) Spatio-temporal  
16 correlation tensors reveal functional structure in human brain. *PLoS One* 8 (12):e82107.  
17 doi:10.1371/journal.pone.0082107
- 18 47. Kim E, Seo HG, Lee HH, Lee SH, Choi SH, Cho WS, Wagner AK, Oh BM (2019) Altered White  
19 Matter Integrity after Mild to Moderate Traumatic Brain Injury. *J Clin Med* 8 (9).  
20 doi:10.3390/jcm8091318
- 21 48. Niogi SN, Mukherjee P, Ghajar J, Johnson CE, Kolster R, Lee H, Suh M, Zimmerman RD, Manley  
22 GT, McCandliss BD (2008) Structural dissociation of attentional control and memory in adults with  
23 and without mild traumatic brain injury. *Brain* 131 (Pt 12):3209-3221. doi:10.1093/brain/awn247
- 24 49. Fox MD, Snyder AZ, Vincent JL, Corbetta M, Van Essen DC, Raichle ME (2005) The human brain  
25 is intrinsically organized into dynamic, anticorrelated functional networks. *Proc Natl Acad Sci U S A*  
26 102 (27):9673-9678. doi:10.1073/pnas.0504136102
- 27 50. Martino J, Brogna C, Robles SG, Vergani F, Duffau H (2010) Anatomic dissection of the inferior  
28 fronto-occipital fasciculus revisited in the lights of brain stimulation data. *Cortex* 46 (5):691-699.  
29 doi:10.1016/j.cortex.2009.07.015
- 30 51. Antonakakis M, Dimitriadis SI, Zervakis M, Papanicolaou AC, Zouridakis G (2017)  
31 Reconfiguration of dominant coupling modes in mild traumatic brain injury mediated by delta-band  
32 activity: A resting state MEG study. *Neuroscience* 356:275-286.  
33 doi:10.1016/j.neuroscience.2017.05.032
- 34 52. Sours C, Chen H, Roys S, Zhuo J, Varshney A, Gullapalli RP (2015) Investigation of Multiple  
35 Frequency Ranges Using Discrete Wavelet Decomposition of Resting-State Functional Connectivity in  
36 Mild Traumatic Brain Injury Patients. *Brain Connect* 5 (7):442-450. doi:10.1089/brain.2014.0333
- 37 53. Bartzokis G, Lu PH, Tingus K, Mendez MF, Richard A, Peters DG, Oluwadara B, Barrall KA, Finn  
38 JP, Villablanca P, Thompson PM, Mintz J (2010) Lifespan trajectory of myelin integrity and maximum  
39 motor speed. *Neurobiol Aging* 31 (9):1554-1562. doi:10.1016/j.neurobiolaging.2008.08.015
- 40 54. Bai L, Bai G, Wang S, Yang X, Gan S, Jia X, Yin B, Yan Z (2020) Strategic white matter injury  
41 associated with long-term information processing speed deficits in mild traumatic brain injury. *Hum*  
42 *Brain Mapp*. doi:10.1002/hbm.25135

- 1 55. Belanger HG, Curtiss G, Demery JA, Lebowitz BK, Vanderploeg RD (2005) Factors moderating  
2 neuropsychological outcomes following mild traumatic brain injury: a meta-analysis. *J Int*  
3 *Neuropsychol Soc* 11 (3):215-227. doi:10.1017/S1355617705050277
- 4 56. Mac Donald CL, Barber J, Andre J, Panks C, Zalewski K, Temkin N (2019) Longitudinal  
5 neuroimaging following combat concussion: sub-acute, 1 year and 5 years post-injury. *Brain Commun*  
6 1 (1):fcz031. doi:10.1093/braincomms/fcz031
- 7 57. Dall'Acqua P, Johannes S, Mica L, Simmen HP, Glaab R, Fandino J, Schwendinger M, Meier C,  
8 Ulbrich EJ, Muller A, Baetschmann H, Jancke L, Hanggi J (2017) Functional and Structural Network  
9 Recovery after Mild Traumatic Brain Injury: A 1-Year Longitudinal Study. *Front Hum Neurosci*  
10 11:280. doi:10.3389/fnhum.2017.00280
- 11
- 12



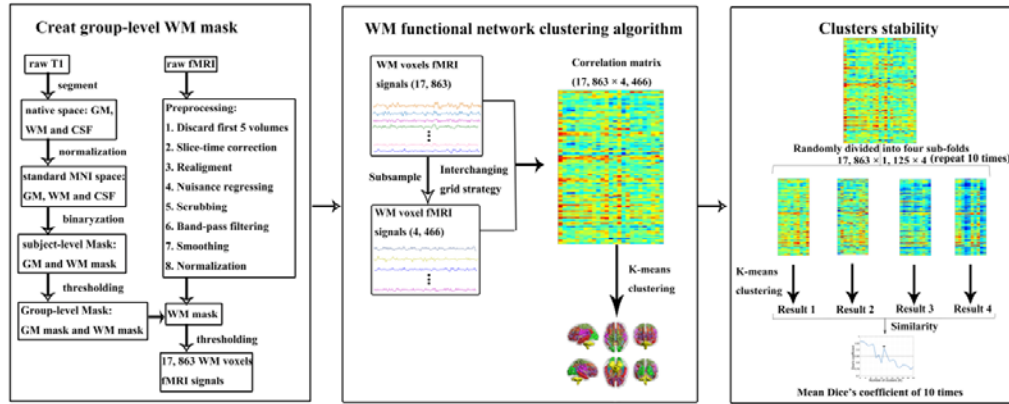

1

2 **Fig. 1** Method overview of white matter functional networks clustering analysis

3

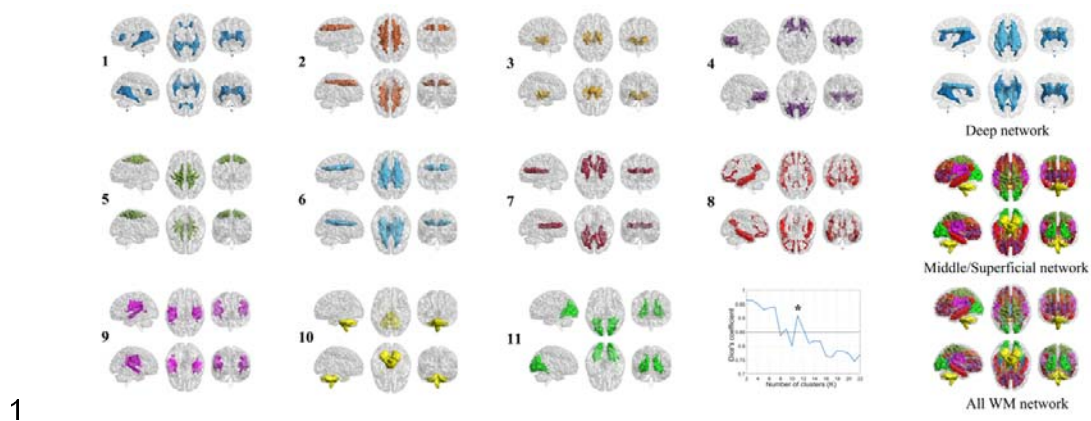

1

2 **Fig. 2** Clusters stability, white matter functional networks (WM-FNs) of most suitable clusters ( $k = 11$ ),

3 and middle/superficial and deep WM-FNs

4

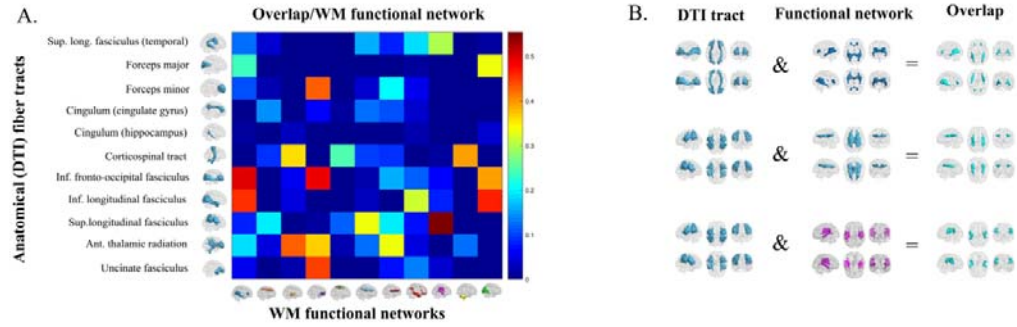

1

2 **Fig. 3** The spatial similarity between the white matter functional networks (WM-FNs) and diffusion

3 tensor imaging (DTI) fiber tracts. (a) the ratio between the voxel number of overlapping and the voxel

4 number of WM-FN. (b) Examples about the spatial interaction between the WM-FN and DTI fiber

5 tract

6

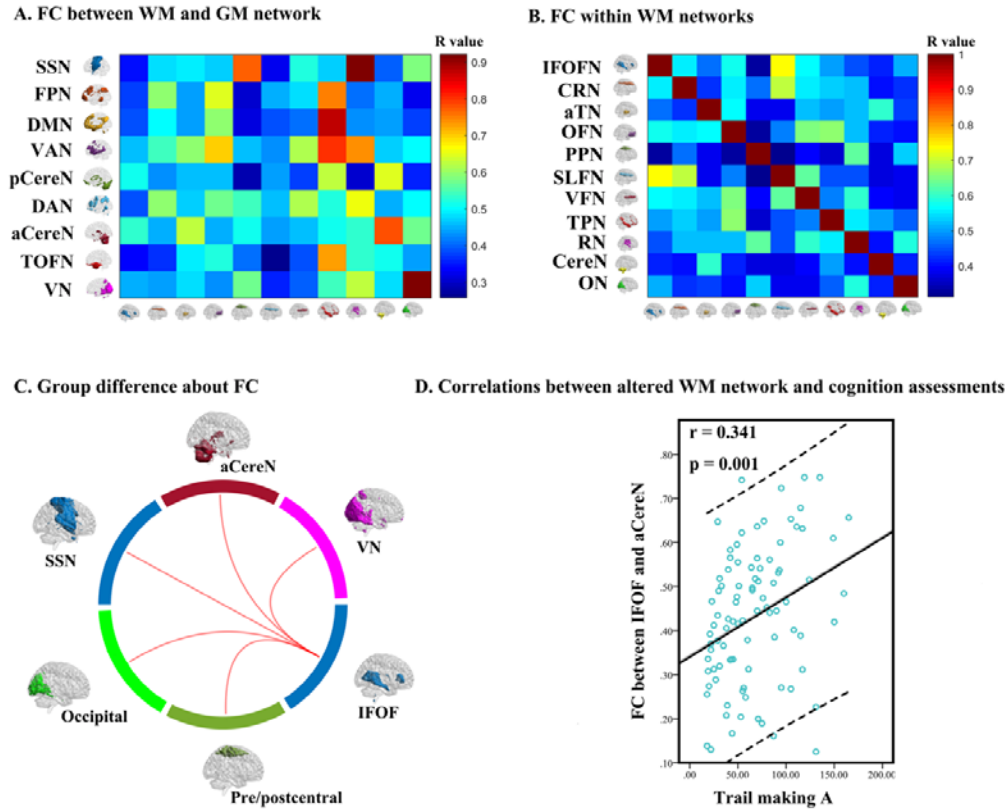

1

2 **Fig. 4** Functional connectivity (FC) of white matter functional networks (WM-FNs) in the acute stage  
 3 mild traumatic brain injury (mTBI) patients and healthy controls (HCs). (a) Average FC between the  
 4 WM-FNs and grey matter functional networks (GM-FNs). (b) Average FC within WM-FNs. (c) Group  
 5 differences between patients and HCs in FC within WM-FNs or between WM-FN and GM-FN. The  
 6 red connections represented significantly increased FC in mTBI patients when compared with HCs  
 7 (FDR corrected,  $p < 0.05$ ). (d) Correlations between abnormal FC and cognition assessments

8

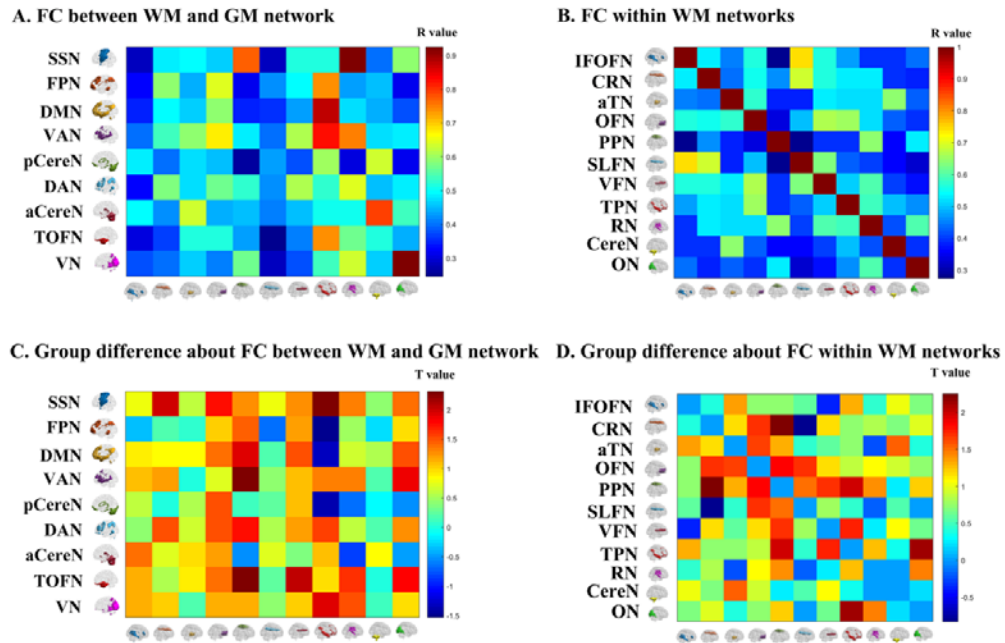

1

2 **Fig. 5** Functional connectivity (FC) of white matter functional networks (WM-FNs) in the chronic  
3 stage mild traumatic brain injury (mTBI) patients and healthy controls (HCs). (a) Average FC between  
4 the WM-FNs and grey matter functional networks (GM-FNs). (b) Average FC within WM-FNs. (c)  
5 Group differences of FC within distinct WM-FNs between mTBI patients and HCs. (d) Group  
6 differences of FC between WM-FNs and GM-FNs between mTBI patients and HCs. The color bar in (a)  
7 and (b) shows the Pearson's correlation coefficient (R value). The color bar in (c) and (d) shows the T  
8 value from the two-sample t-test

9

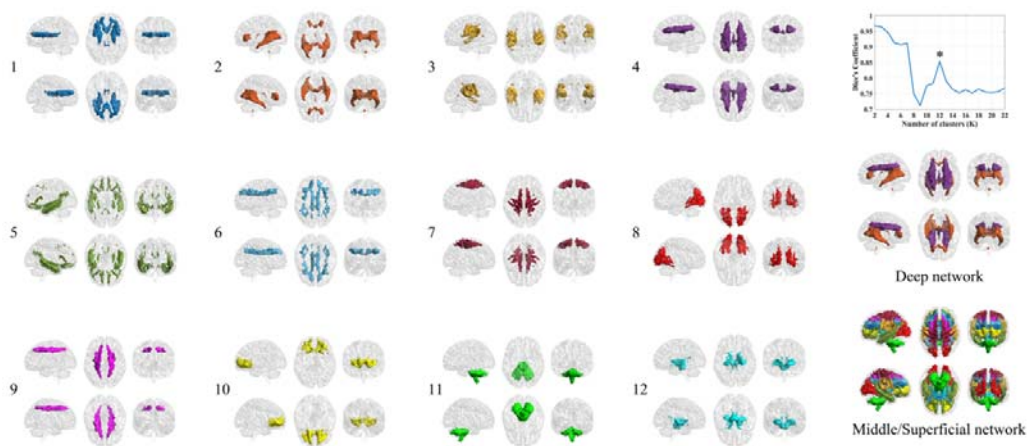

1

2 **Supp Fig. 1** White matter functional networks identified by patients in the chronic stage and healthy

3 control

4

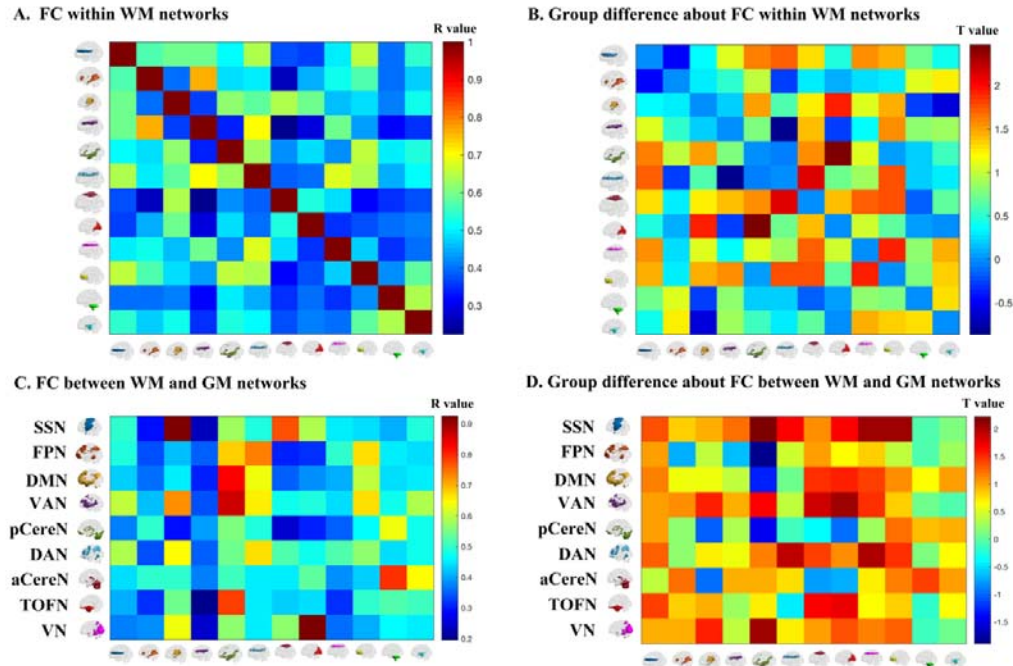

1

2 **Supp Fig. 2** Functional connectivity (FC) of white matter functional networks (WM-FNs) in chronic  
3 stage mild traumatic brain injury (mTBI) patients and healthy controls (HCs). (a) Average FC within  
4 WM-FNs. (b) Group differences between mTBI patients and HCs in FC within WM-FNs (c) Average  
5 FC between the WM-FNs and grey matter functional networks (GM-FNs). (d) Group differences  
6 between mTBI patients and HCs in FC between WM-FNs and GM-FNs. The color bar in (a) and (c)  
7 shows the Pearson's correlation coefficient (R value). The color bar in (b) and (d) shows the T value  
8 from the two-sample t-test

1 **Table 1** Demographic characteristics of the mTBI patients and HCs

| characteristics                           | mTBI (n=97)<br>(acute stage) | mTBI (n=56)<br>(chronic stage) | HCs (n=43)    | p1     | p2     |
|-------------------------------------------|------------------------------|--------------------------------|---------------|--------|--------|
| Age (years)                               | 38.99 ± 13.76                | 35.32±15.32                    | 39.93 ± 13.09 | 0.454  | 0.064  |
| Gender (male:female)                      | 48:49                        | 33:23                          | 20:23         | 0.745  | 0.220  |
| Education (years)                         | 7.95 ± 3.99                  | 8.54±3.77                      | 8.77 ± 5.50   | 0.598  | 0.804  |
| Mean FD                                   | 0.11±0.10                    | 0.11±0.07                      | 0.11±0.06     | 0.930  | 0.801  |
| <b>Cognitive and Clinical assessments</b> |                              |                                |               |        |        |
| TMT-A                                     | 73.07±50.55                  | 44.86±35.88                    | 52.30±29.97   | 0.023  | 0.109  |
| DSC                                       | 31.99±16.30                  | 44.54±15.34                    | 39.63±17.72   | 0.021  | 0.283  |
| Forward DS                                | 7.75±1.56                    | 8.57±1.59                      | 7.81±1.60     | 0.835  | 0.037  |
| Backward DS                               | 3.80±1.47                    | 4.79±1.60                      | 3.95±1.45     | 0.564  | 0.008  |
| VF                                        | 16.43±5.47                   | 18.86±6.19                     | 17.28±6.02    | 0.389  | 0.147  |
| RPCS                                      | 11±8.13                      | 5±5.30                         | 2.49±2.88     | <0.001 | 0.014  |
| ISI                                       | 7.08±5.79                    | 3.39±4.53                      | 1.44±2.64     | <0.001 | 0.009  |
| PCL-C                                     | 25.12±6.18                   | 21.66±5.69                     | 17±0          | <0.001 | <0.001 |

2 Abbreviations: mTBI, mild traumatic brain injury; HCs, healthy controls; TMT-A, trail making test A;  
 3 DSC, digit symbol coding; DS, digit span; VF, verbal fluency; RPCS, rivermead post-concussion  
 4 symptom questionnaire; ISI, insomnia severity index; PCL-C, posttraumatic stress disorder  
 5 checklist-civilian version.

6 p1 represents the p-values from statistical test between mTBI in acute stage and HCs.

7 p2 represents the p-values from statistical test between mTBI in chronic stage and HCs.

8



**1 Table 2** Overlap of WM-FNs with white matter fiber tracts, correlation with GM-FNs and WM-FNs

| Number                 | Putative WM-FNs designation | Layer              | Overlap/WM-FNs (>15%)        | Correlation with GM-FNs (r>0.7) | Correlation with WM-FNs (r>0.7) |
|------------------------|-----------------------------|--------------------|------------------------------|---------------------------------|---------------------------------|
| 1                      | IFOF network                | Deep               | IFOF (50.23%)                | -                               | SLF network (0.74)              |
| ILF (45.72%)           |                             |                    | -                            | -                               |                                 |
| Forceps major (23.98%) |                             |                    | -                            | -                               |                                 |
| ATR (18.21%)           |                             |                    | -                            | -                               |                                 |
| 2                      | Corona radiata network      | Middle/Superficial | SLF (19.86%)                 | -                               | -                               |
| 3                      | Anterior temporal network   | Middle/Superficial | ATR (42.61%)                 | -                               | -                               |
|                        |                             |                    | Corticospinal tract (35.81%) | -                               | -                               |
| 4                      | Orbitofrontal network       | Middle/Superficial | IFOF (48.82%)                | -                               | -                               |
|                        |                             |                    | Uncinate fasciculus (44.63%) | -                               | -                               |
|                        |                             |                    | Forceps minor (43.06%)       | -                               | -                               |
|                        |                             |                    | ATR (36.71%)                 | -                               | -                               |
| 5                      | Pre/postcentral network     | Middle/Superficial | Corticospinal tract (24.74%) | SSN (0.77)                      | -                               |
| 6                      | SLF network                 | Deep               | SLF (32.96%)                 | -                               | IFOF network (0.74)             |
|                        |                             |                    | SLF (temporal) (16.35%)      | -                               | -                               |
| 7                      | Ventral frontal network     | Middle/Superficial | ATR (33.27%)                 | -                               | -                               |
|                        |                             |                    | Forceps minor (20.53%)       | -                               | -                               |
|                        |                             |                    | SLF (19.81%)                 | -                               | -                               |
|                        |                             |                    | IFOF (15.99%)                | -                               | -                               |
| 8                      | Temporoparietal network     | Middle/Superficial | ILF (31.89%)                 | DMN (0.87)                      | -                               |
|                        |                             |                    | SLF (temporal) (18.68%)      | VAN (0.80)                      | -                               |
|                        |                             |                    | -                            | FPN (0.75)                      | -                               |
|                        |                             |                    | -                            | TOFN (0.73)                     | -                               |
| 9                      | Rolandic network            | Middle/Superficial | SLF (55.44%)                 | SSN (0.92)                      | -                               |
|                        |                             |                    | -                            | VAN (0.73)                      | -                               |
| 10                     | Cerebellar network          | Middle/Superficial | Corticospinal tract (39.31%) | aCereN (0.78)                   | -                               |
| 11                     | Occipital network           | Middle/Superficial | ILF (46.76%)                 | VN (0.92)                       | -                               |
|                        |                             |                    | IFOF (39.44%)                | -                               | -                               |
|                        |                             |                    | Forceps major (32.97%)       | -                               | -                               |

2 Abbreviations: WM-FNs, white matter functional networks; GM-FNs, grey matter functional networks;  
3 IFOF, inferior fronto-occipital fasciculus; ILF, inferior longitudinal fasciculus; ATR, anterior thalamic  
4 radiation; SLF, superior longitudinal fasciculus; SSN, sensorimotor network; DMN, default mode  
5 network; VAN, ventral attention network; FPN, frontoparietal network; TOFN, temporal-orbitofrontal  
6 network; aCereN, anterior cerebellar network; VN, visual network;  
7

1 **Table 3** Group differences between mTBI patients in the acute stage and HCs in FC within WM-FNs  
2 and between WM-FNs and GM-FNs

| WM-FNs                                     | Functional networks       | t value | p value |
|--------------------------------------------|---------------------------|---------|---------|
| Inferior fronto-occipital fasciculus WM-FN | Visual GM-FN              | 4.085   | 0.007   |
|                                            | Anterior cerebellar GM-FN | 3.266   | 0.048   |
|                                            | Sensorimotor GM-FN        | 3.252   | 0.048   |
|                                            | Occipital WM-FN           | 3.546   | 0.030   |
|                                            | Pre/postcentral WM-FN     | 3.205   | 0.046   |

3 Abbreviations: mTBI, mild traumatic brain injury; HCs, healthy controls; FC, functional connectivity;

4 WM-FNs, white matter functional networks; GM-FNs, grey matter functional networks; WM-FN,

5 white matter functional network; GM-FNs, grey matter functional network;

6 Note: FDR corrected  $p < 0.05$ .

7
